# Supplementary material for: Circle of Willis variation and outcome after intra-arterial treatment
Source: HighWire-hosted journal article supplement (doi:10.1136/bmjno-2022-000340), 2022-09-01
Supplement: bmjno-2022-000340supp001_data_supplement.pdf [file bmjno-2022-000340supp001_data_supplement.pdf]

Web table Adjusted Risk ratios for good clinical outcome at discharge and 3 months

|              |                                  | Complete vs incomplete |                     | Carotid score       |                    |
|--------------|----------------------------------|------------------------|---------------------|---------------------|--------------------|
|              |                                  | Circle of Willis       | 1 vs 0              | 2 vs 0              | 1 vs 2             |
| At discharge | Risk ratio (RR, 95% CI)          | 0.82 (0.38 - 1.78)     | 1.29 (0.20 - 8.43)  | 1.85 (0.30 - 11.39) | 1.44 (0.74- 2.80)  |
|              | Adjusted RR Age                  | 0.79 (0.38 - 1.67)     | 1.13 (0.18 - 7.10)  | 1.48 (0.24 - 9.11)  | 1.32 (0.68 - 2.60) |
|              | Adjusted RR NIHSS <sup>†</sup>   | 0.84 (0.42 - 1.65)     | 1.22 (0.20 - 7.46)  | 1.48 (0.25 - 8.58)  | 1.22 (0.63 - 2.33) |
|              | Adjusted RR time to IAT          | 0.86 (0.33 - 2.23)     | 1.05 (0.16 - 6.90)  | 1.49 (0.25 - 8.91)  | 1.41 (0.61 - 3.25) |
|              | Adjusted RR ASPECTS <sup>‡</sup> | 0.90 (0.44 - 1.85)     | 1.76 (0.28 - 11.11) | 2.41 (0.40 - 14.41) | 1.37 (0.72 - 2.62) |
|              | Adjusted RR CFG <sup>§</sup>     | 0.96 (0.46 - 2.01)     | 1.00 (0.19 - 5.12)  | 1.26 (0.26 - 6.12)  | 1.28 (0.67 - 2.44) |
|              | Adjusted RR CBS <sup>¶</sup>     | 0.82 (0.38 - 1.75)     | 1.30 (0.20 - 8.66)  | 1.83 (0.29 - 11.34) | 1.39 (0.71 - 2.72) |
| At 3 months  | Risk ratio (RR, 95 CI)           | 1.01 (0.61 - 1.67)     | 2.00 (0.32 - 12.59) | 2.92 (0.48 - 17.75) | 1.46 (0.90 - 2.37) |
|              | Adjusted RR Age                  | 0.98 (0.61 - 1.57)     | 1.83 (0.29 - 11.56) | 2.53 (0.41 - 15.52) | 1.38 (0.84 - 2.24) |
|              | Adjusted RR NIHSS <sup>†</sup>   | 1.02 (0.62 - 1.67)     | 1.90 (0.32 - 11.41) | 2.68 (0.46 - 15.72) | 1.42 (0.87 - 2.31) |
|              | Adjusted RR time to IAT          | 1.10 (0.61 - 2.00)     | 1.82 (0.34 - 9.62)  | 2.68 (0.54 - 13.30) | 1.47 (0.82 - 2.63) |
|              | Adjusted RR ASPECTS <sup>‡</sup> | 1.08 (0.66 - 1.76)     | 2.30 (0.37 - 14.21) | 3.30 (0.56 - 19.58) | 1.43 (0.89 - 2.32) |
|              | Adjusted RR CFG <sup>§</sup>     | 1.05 (0.62 - 1.76)     | 1.56 (0.29 - 8.37)  | 2.25 (0.43 - 11.66) | 1.45 (0.88 - 2.39) |
|              | Adjusted RR CBS <sup>¶</sup>     | 1.00 (0.60 - 1.65)     | 1.99 (0.32 - 12.53) | 2.98 (0.48 - 18.32) | 1.51 (0.92 - 2.48) |

<sup>†</sup>NIHSS: National Institutes Health Stroke Scale. <sup>‡</sup>ASPECTS: Alberta Stroke Program Early CT score<sup>21</sup>. <sup>§</sup>CFG: Collateral Flow Grading<sup>22</sup>. <sup>¶</sup>CBS: Clot Burden Score<sup>20</sup>.
